# Supplementary material for: Sensitivity of hydrological machine learning prediction accuracy to information quantity and quality
Source: Copernicus journal article supplement (doi:10.5194/hess-2024-284), 2024-10-07
Supplement: Supplementary file 1 [file hess-2024-284-supplement.pdf]

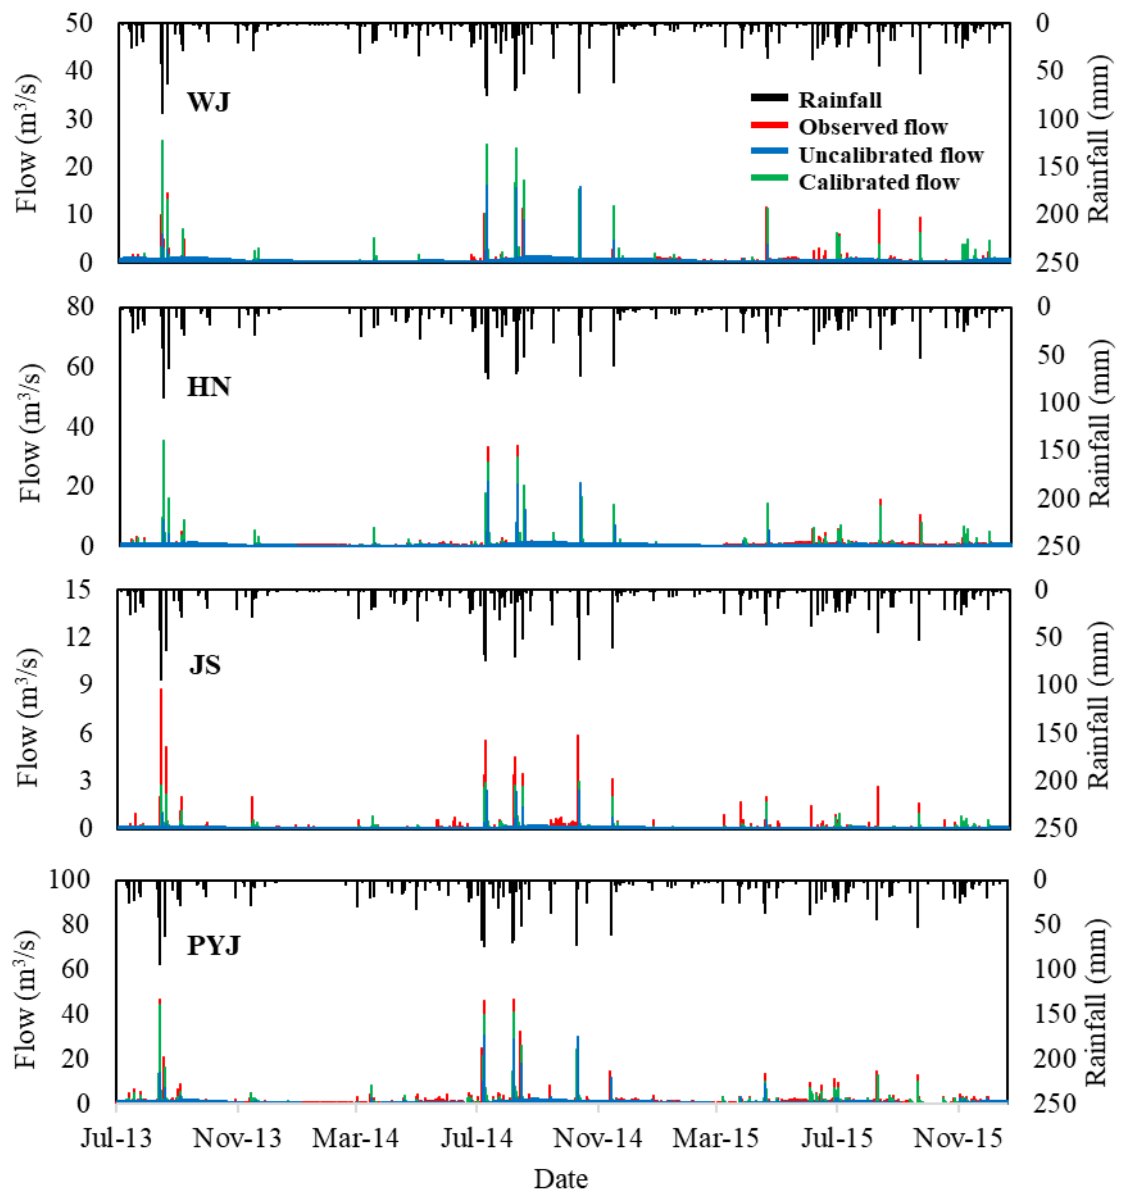

**Figure S1.** Comparison of daily streamflow predicted using the mechanistic models (i.e., uncalibrated and calibrated SWAT models) and observed during the training period (July 12, 2013, to December 31, 2015).

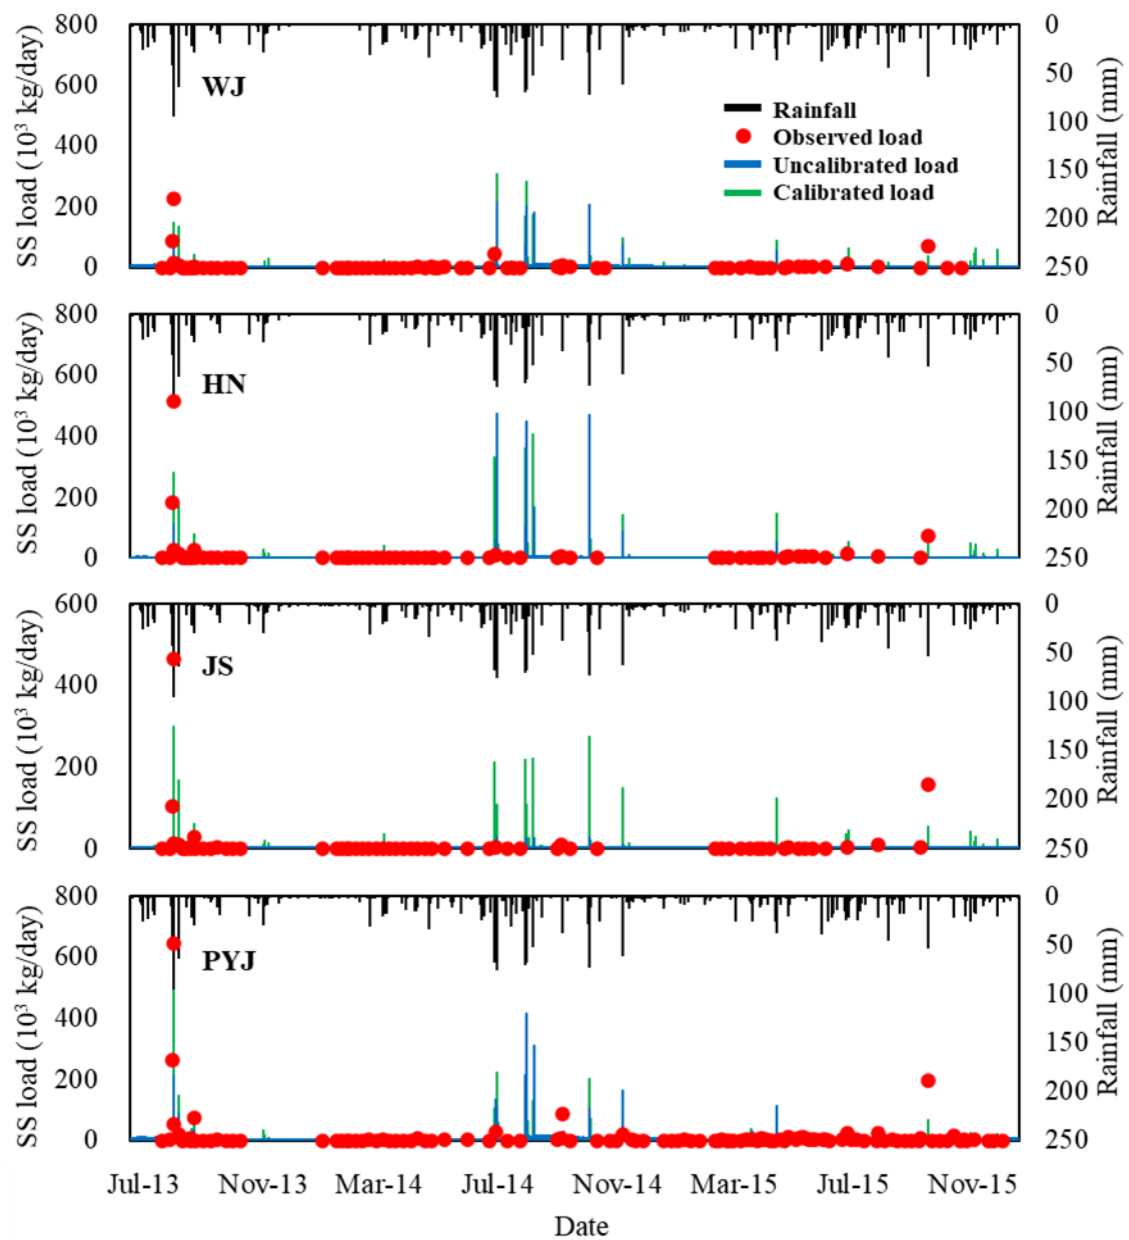

**Figure S2.** Comparison of daily SS loads predicted using the mechanistic models (i.e., uncalibrated and calibrated SWAT models) and observed during the training period (July 12, 2013, to December 31, 2015).

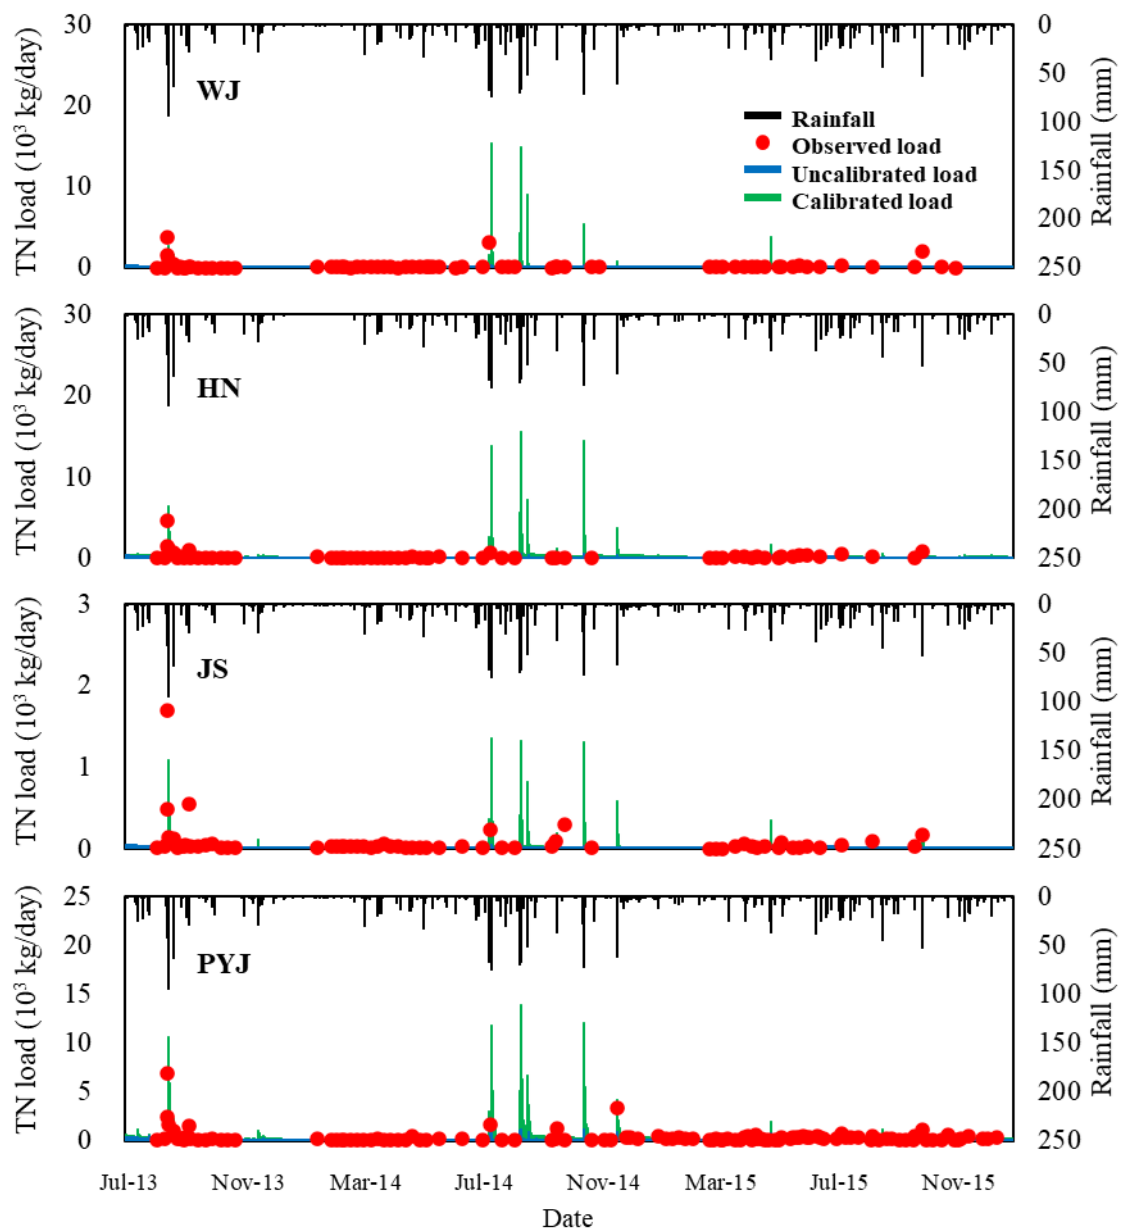

**Figure S3.** Comparison of daily TN loads predicted using the mechanistic models (i.e., uncalibrated and calibrated SWAT models) and observed during the training period (July 12, 2013, to December 31, 2015).

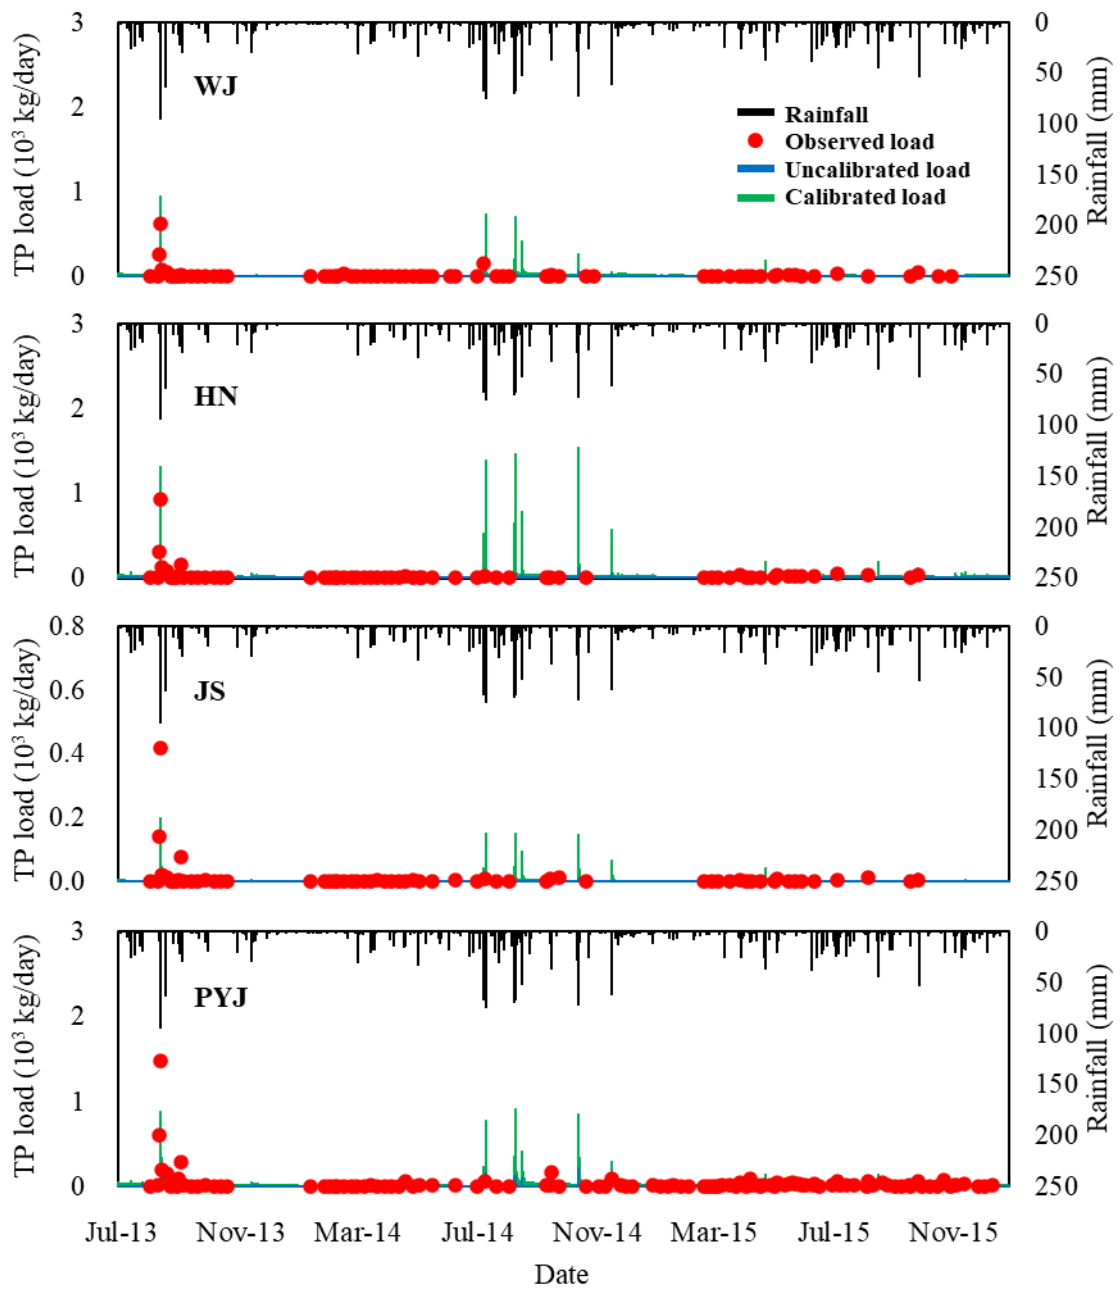

**Figure S4.** Comparison of daily TP loads predicted using the mechanistic models (i.e., uncalibrated and calibrated SWAT models) and observed during the training period (July 12, 2013, to December 31, 2015).

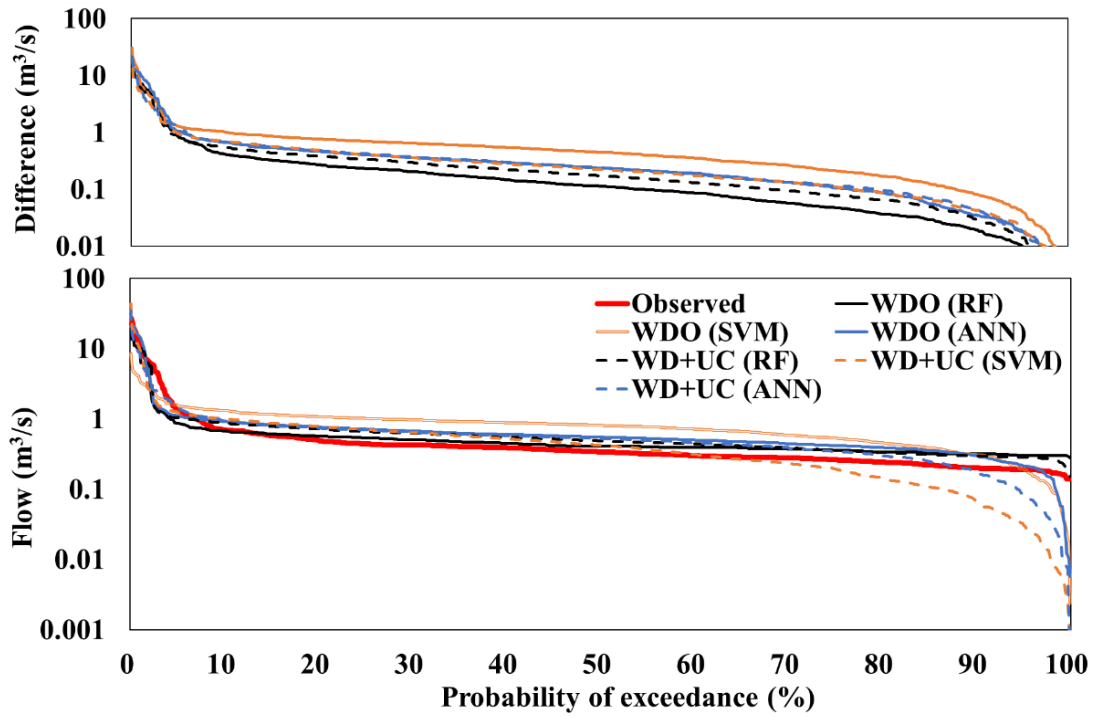

(a) the WDO and WD+UC cases.

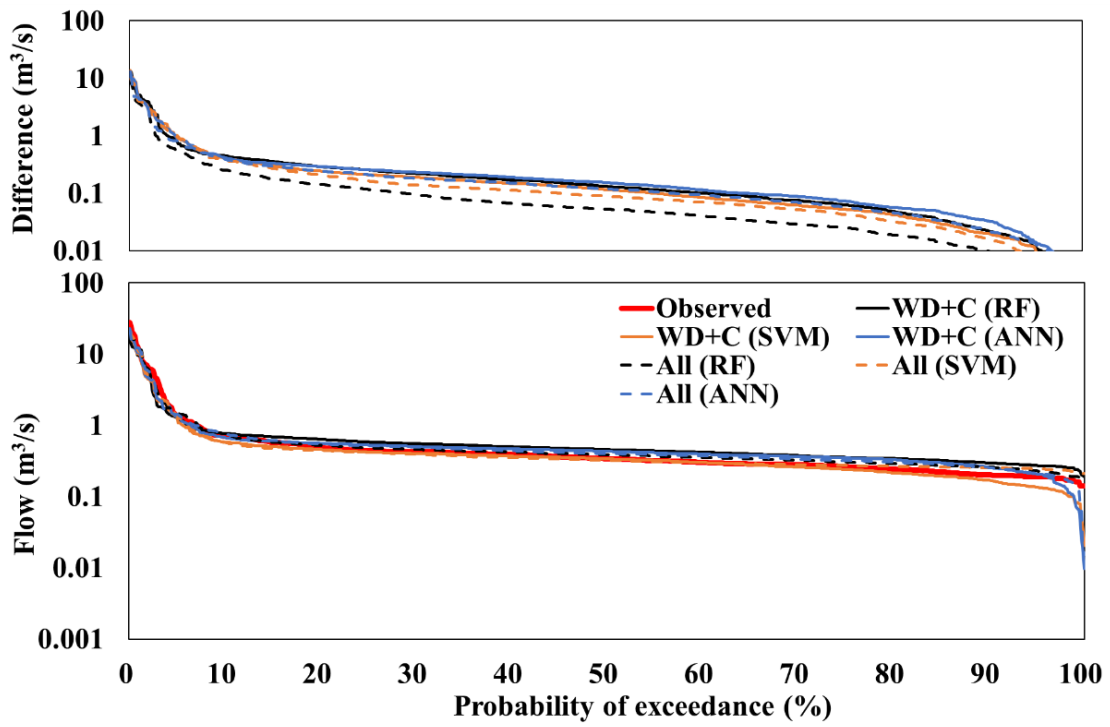

(b) the WD+C and All cases.

**Figure S5.** Comparison of flow duration curves (FDC) predicted using the ML models and observed at the outlet of the WJ watershed.

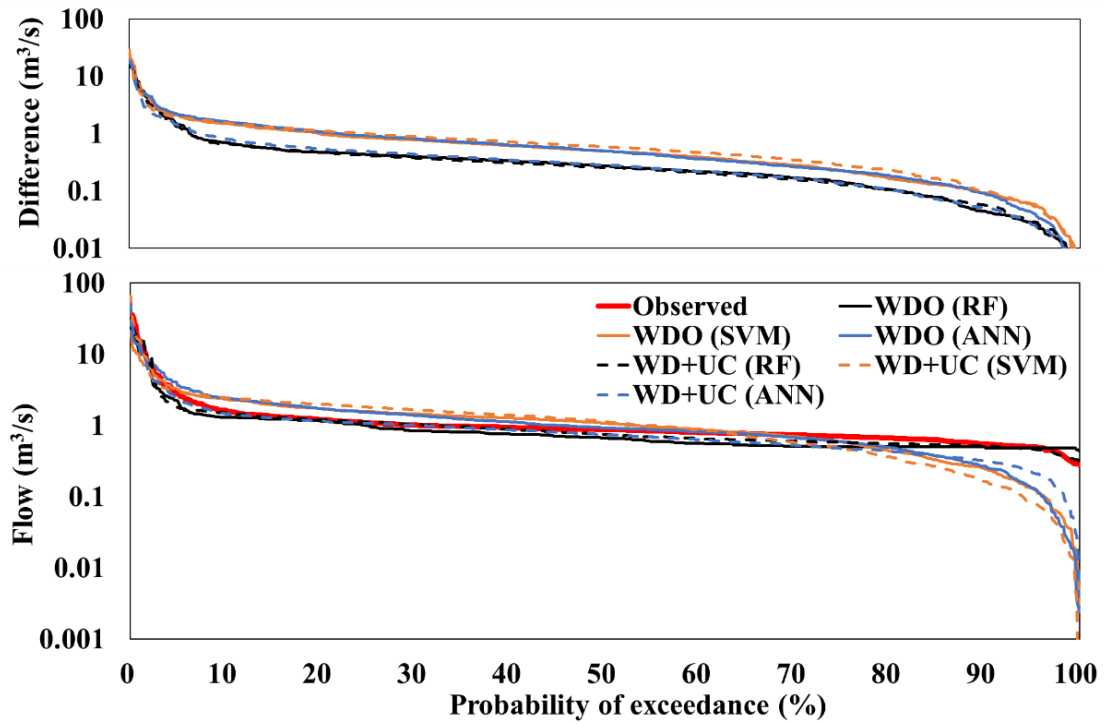

(a) the WDO and WD+UC cases.

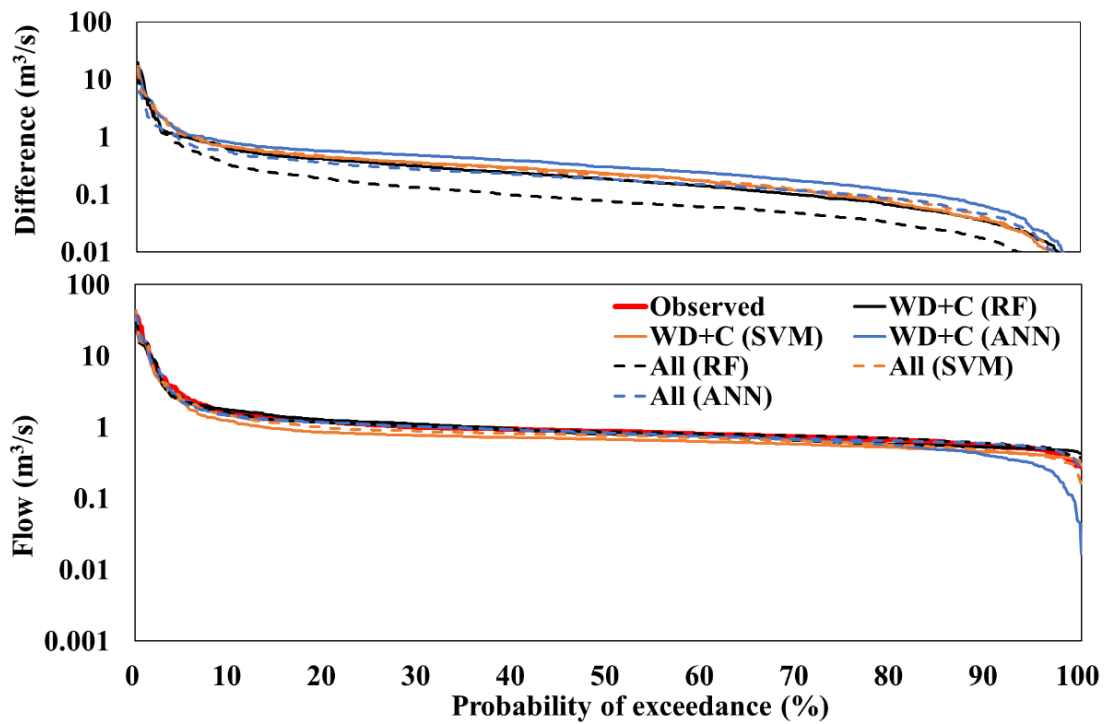

(b) the WD+C and All cases.

**Figure S6.** Comparison of flow duration curves (FDC) predicted using the ML models and observed at the outlet of the HN watershed.

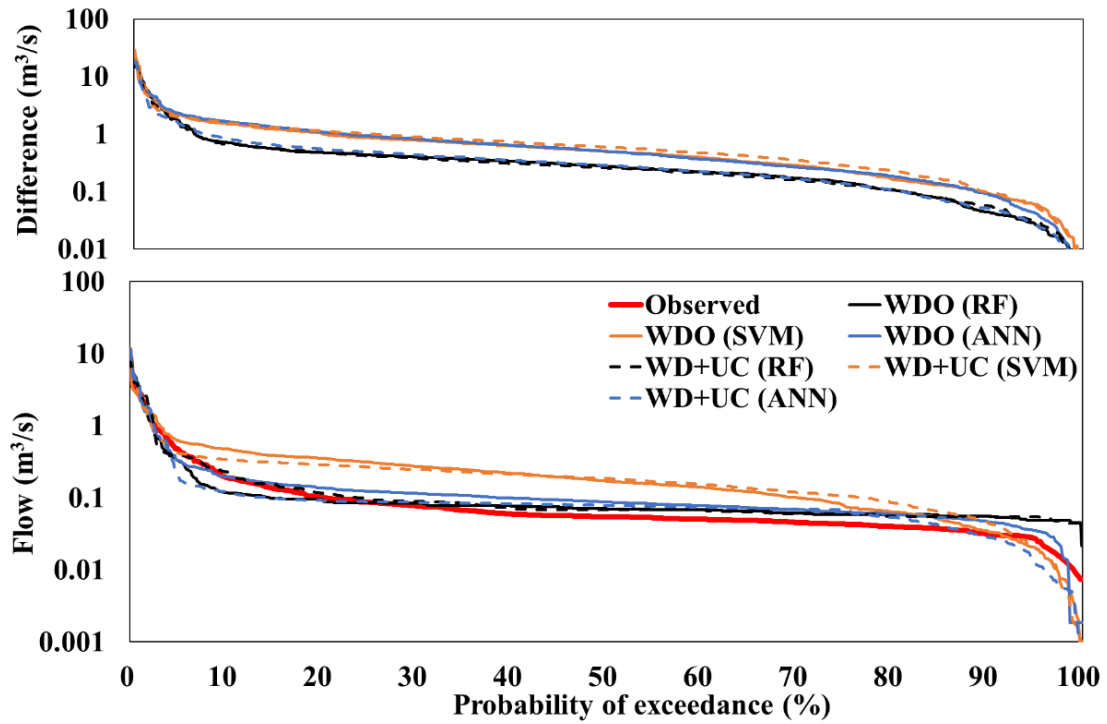

(a) the WDO and WD+UC cases.

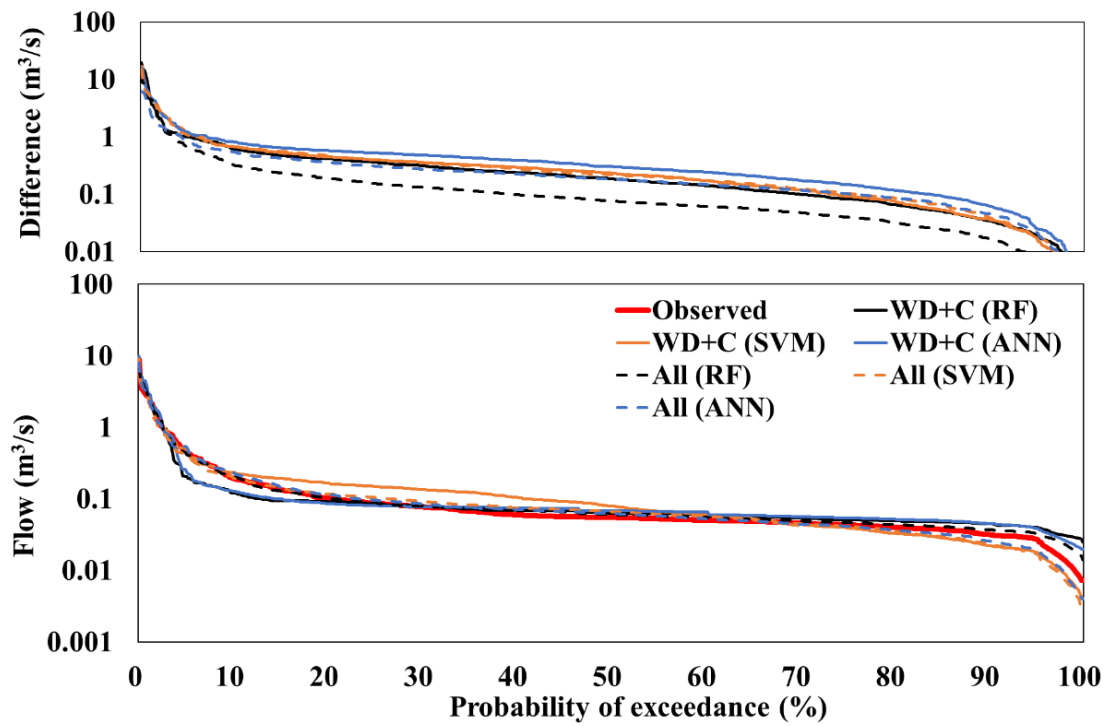

(b) the WD+C and All cases.

**Figure S7.** Comparison of flow duration curves (FDC) predicted using the ML models and observed at the outlet of the JS watershed.

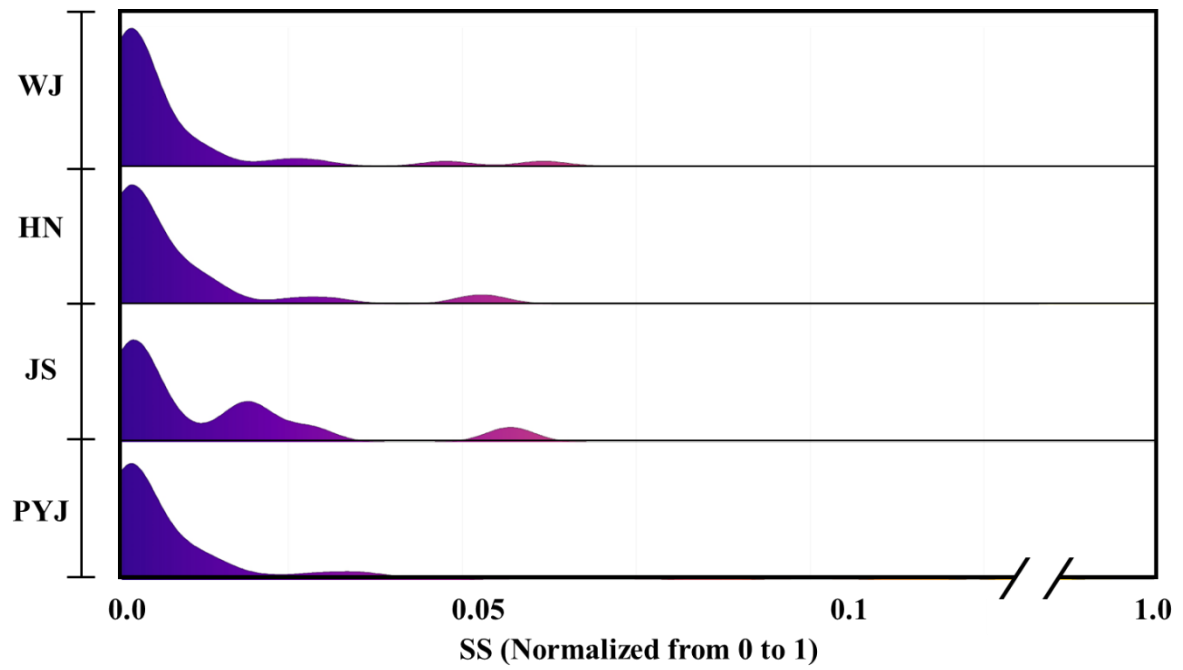

**Figure S8.** Density (or frequency) distributions of observed SS concentrations during the training period. The SS concentrations were normalized from 0 to 1 for each watershed.



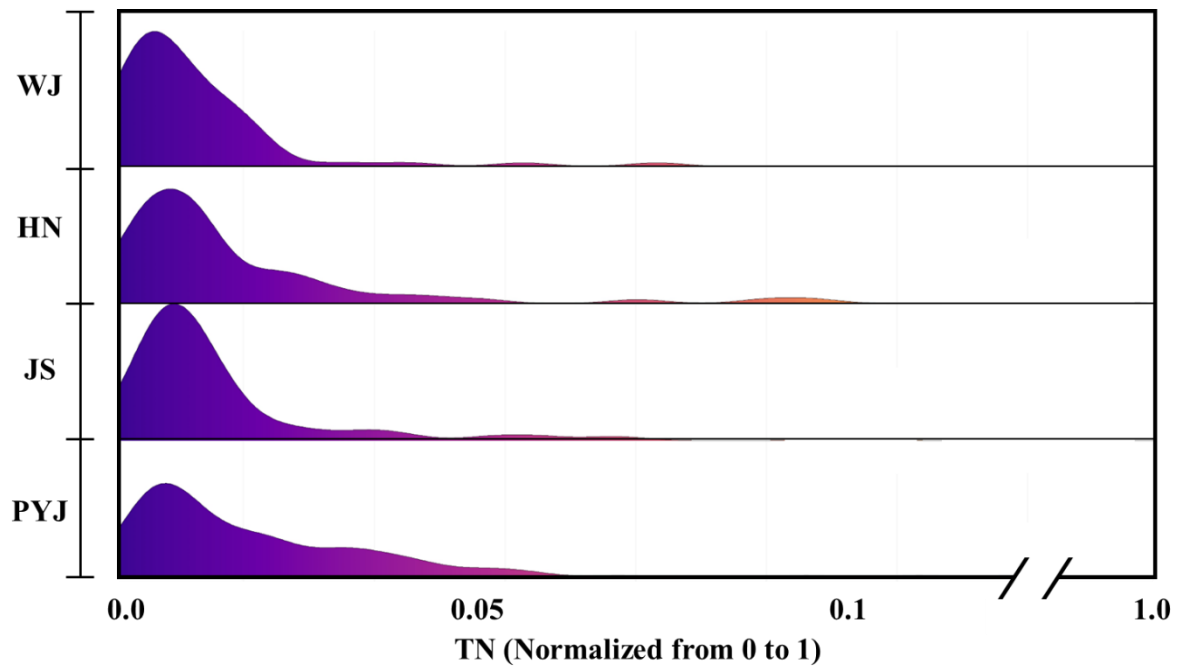

**Figure S9.** Density (or frequency) distributions of observed TN concentrations during the training period. The TN concentrations were normalized from 0 to 1 for each watershed.

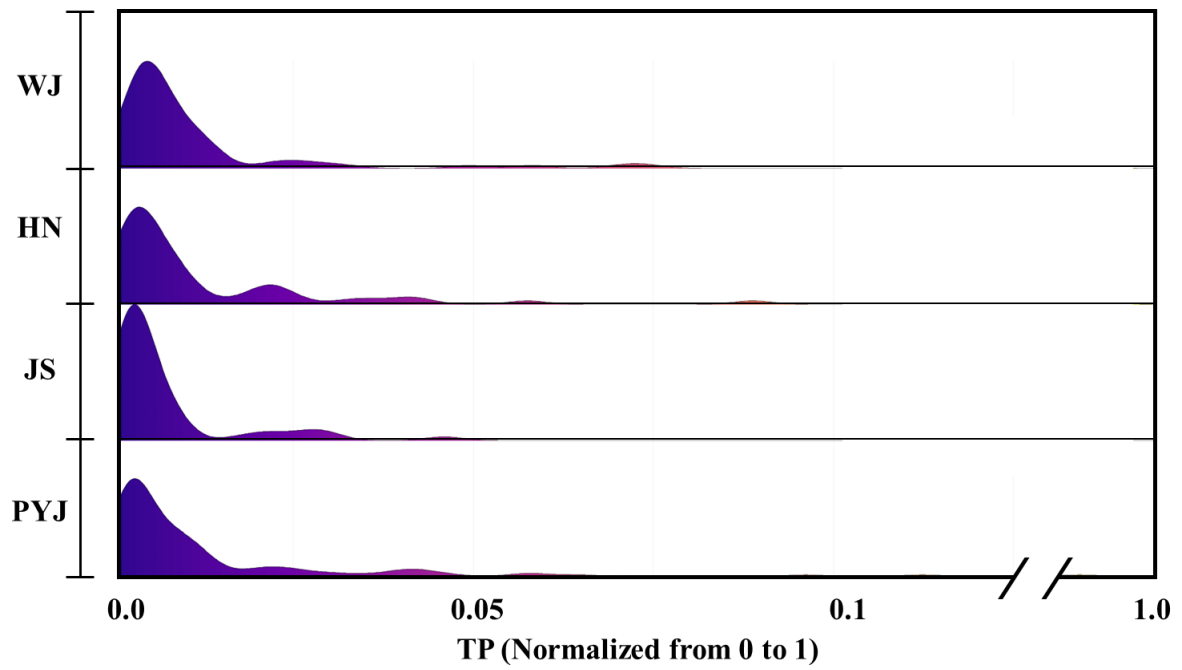

**Figure S10.** Density (or frequency) distributions of observed TP concentrations during the training period. The TP concentrations were normalized from 0 to 1 for each watershed.

**Table S1.** Land use and cover statistics of the study watersheds.

| Study Watersheds | Average Slope (%) | Land uses and Covers (km <sup>2</sup> ) |                |                |                |              | Total           |
|------------------|-------------------|-----------------------------------------|----------------|----------------|----------------|--------------|-----------------|
|                  |                   | Urban                                   | Field          | Paddy field    | Forest         | Other        |                 |
| WJ               | 6.43              | 1.88<br>(5%)                            | 6.63<br>(19%)  | 14.77<br>(43%) | 8.45<br>(24%)  | 3.02<br>(9%) | 34.75<br>(100%) |
| HN               | 5.49              | 5.68<br>(13%)                           | 9.28<br>(21%)  | 17.19<br>(38%) | 9.33<br>(21%)  | 3.62<br>(8%) | 45.09<br>(100%) |
| JS               | 4.39              | 2.40<br>(31%)                           | 1.21<br>(15%)  | 2.07<br>(26%)  | 1.73<br>(22%)  | 0.42<br>(5%) | 7.83<br>(100%)  |
| PYJ              | 4.85              | 11.46<br>(19%)                          | 22.36<br>(36%) | 11.23<br>(18%) | 11.45<br>(19%) | 4.90<br>(8%) | 61.40<br>(100%) |

**Table S2.** Descriptive statistics of observations and training data.

| Variables | WS* | Unit              | Min   | Mean  | Max     | Std. Dev.** | CoV (%)*** | Number of observations |
|-----------|-----|-------------------|-------|-------|---------|-------------|------------|------------------------|
| P         | -   | mm                | 0.00  | 2.98  | 135.0   | 9.66        | 324.2      | 1,634                  |
| AT        | -   | °C                | -9.50 | 15.0  | 31.5    | 9.34        | 62.3       | 1,634                  |
| WS        | -   | m/s               | 0.40  | 1.71  | 5.30    | 0.74        | 43.3       | 1,634                  |
| RH        | -   | %                 | 23.9  | 68.7  | 99.0    | 14.6        | 21.3       | 1,634                  |
| SR        | -   | MJ/m <sup>2</sup> | 0.0   | 14.1  | 32.1    | 7.06        | 50.1       | 1,634                  |
| E         | -   | mm                | 0.29  | 3.66  | 9.60    | 2.02        | 55.2       | 1,634                  |
| Flow      | WJ  | m <sup>3</sup> /s | 0.09  | 0.68  | 27.7    | 1.89        | 276.9      | 1,634                  |
|           | HN  |                   | 0.22  | 1.21  | 36.7    | 2.65        | 219.6      | 1,634                  |
|           | JS  |                   | 0.00  | 0.16  | 8.91    | 0.53        | 336.9      | 1,634                  |
|           | PYJ |                   | 0.24  | 1.69  | 70.0    | 3.75        | 221.6      | 1,634                  |
| SS        | WJ  | mg/L              | 1.73  | 25.1  | 244.0   | 33.6        | 133.6      | 121                    |
|           | HN  |                   | 3.21  | 28.8  | 236.4   | 39.0        | 135.5      | 109                    |
|           | JS  |                   | 3.35  | 100.2 | 1,110.0 | 209.1       | 208.8      | 109                    |
|           | PYJ |                   | 1.70  | 25.1  | 384.6   | 43.7        | 174.1      | 229                    |
| TN        | WJ  | mg/L              | 0.08  | 2.29  | 6.52    | 0.83        | 36.1       | 121                    |
|           | HN  |                   | 0.98  | 2.39  | 7.86    | 0.87        | 36.3       | 109                    |
|           | JS  |                   | 1.17  | 3.01  | 6.72    | 0.84        | 27.8       | 109                    |
|           | PYJ |                   | 0.70  | 2.19  | 5.74    | 0.69        | 31.4       | 229                    |
| TP        | WJ  | mg/L              | 0.01  | 0.17  | 1.70    | 0.16        | 94.0       | 121                    |
|           | HN  |                   | 0.04  | 0.18  | 1.13    | 0.13        | 72.7       | 109                    |
|           | JS  |                   | 0.02  | 0.20  | 0.82    | 0.12        | 61.2       | 109                    |
|           | PYJ |                   | 0.04  | 0.14  | 0.72    | 0.10        | 69.1       | 229                    |

\* WS: Study Watershed, \*\* Std. Dev.: Standard Deviation, \*\*\* CoV: Coefficient of Variation.

**Table S3.** Information use efficiency achieved by ML models trained with the different combinations of training data sets (unit: none or fraction). The highest efficiency statistics are in bold.

| ML Models | Training Data Sets | Flow         |              | SS           |              | TN           |              | TP           |              |
|-----------|--------------------|--------------|--------------|--------------|--------------|--------------|--------------|--------------|--------------|
|           |                    | ME           | TE           | ME           | TE           | ME           | TE           | ME           | TE           |
| RF        | WD+UC              | 0.009        | <b>5.583</b> | 0.003        | 1.645        | 0.011        | <b>4.674</b> | <b>0.023</b> | 2.473        |
|           | WD+C               | <b>0.017</b> | 1.240        | 0.002        | 1.046        | <b>0.025</b> | 2.994        | 0.021        | <b>4.161</b> |
|           | All                | 0.014        | 1.571        | <b>0.015</b> | <b>2.137</b> | 0.012        | 3.368        | 0.017        | 1.562        |
| SVM       | WD+UC              | 0.031        | <b>9.222</b> | 0.062        | <b>3.913</b> | 0.012        | 1.807        | 0.019        | 2.936        |
|           | WD+C               | <b>0.048</b> | 4.033        | <b>0.140</b> | 3.527        | <b>0.031</b> | <b>2.825</b> | <b>0.036</b> | <b>7.264</b> |
|           | All                | 0.027        | 2.046        | 0.061        | 3.654        | 0.016        | 2.174        | 0.030        | 3.435        |
| ANN       | WD+UC              | 0.010        | 0.777        | 0.021        | 2.004        | 0.041        | 2.215        | 0.021        | 0.564        |
|           | WD+C               | <b>0.018</b> | <b>1.470</b> | <b>0.074</b> | <b>2.033</b> | <b>0.070</b> | <b>4.453</b> | <b>0.053</b> | <b>3.007</b> |
|           | All                | 0.011        | 0.968        | 0.036        | 1.513        | 0.033        | 4.063        | 0.031        | 2.417        |

1 **Table S4.** Summary statistics of TE of the training data sets by the watersheds with different machine learning algorithms.

| Watershed | Training Data Sets | Flow  |       |       | SS    |       |       | TN    |       |       | TP    |       |       |
|-----------|--------------------|-------|-------|-------|-------|-------|-------|-------|-------|-------|-------|-------|-------|
|           |                    | RF    | SVM   | ANN   |
| WJ        | WDO                | 0.299 | 0.315 | 0.265 | 0.385 | 0.210 | 0.174 | 0.215 | 0.240 | 0.276 | 0.174 | 0.281 | 0.246 |
|           | WD+UC              | 0.304 | 0.348 | 0.451 | 0.190 | 0.297 | 0.214 | 0.223 | 0.214 | 0.388 | 0.207 | 0.314 | 0.315 |
|           | WD+C               | 0.394 | 0.486 | 0.485 | 0.294 | 0.415 | 0.381 | 0.263 | 0.327 | 0.312 | 0.210 | 0.335 | 0.340 |
|           | All                | 0.424 | 0.529 | 0.469 | 0.535 | 0.539 | 0.514 | 0.253 | 0.315 | 0.324 | 0.404 | 0.367 | 0.349 |
| HN        | WDO                | 0.290 | 0.328 | 0.378 | 0.282 | 0.173 | 0.125 | 0.251 | 0.173 | 0.167 | 0.349 | 0.375 | 0.101 |
|           | WD+UC              | 0.395 | 0.345 | 0.467 | 0.291 | 0.449 | 0.218 | 0.325 | 0.284 | 0.323 | 0.382 | 0.533 | 0.535 |
|           | WD+C               | 0.439 | 0.509 | 0.457 | 0.461 | 0.433 | 0.432 | 0.312 | 0.420 | 0.274 | 0.387 | 0.488 | 0.456 |
|           | All                | 0.472 | 0.637 | 0.535 | 0.527 | 0.536 | 0.487 | 0.387 | 0.528 | 0.353 | 0.620 | 0.598 | 0.606 |
| JS        | WDO                | 0.354 | 0.355 | 0.333 | 0.333 | 0.225 | 0.213 | 0.368 | 0.379 | 0.173 | 0.365 | 0.258 | 0.137 |
|           | WD+UC              | 0.337 | 0.415 | 0.451 | 0.358 | 0.325 | 0.423 | 0.403 | 0.499 | 0.370 | 0.435 | 0.364 | 0.370 |
|           | WD+C               | 0.481 | 0.470 | 0.482 | 0.447 | 0.511 | 0.394 | 0.485 | 0.531 | 0.439 | 0.409 | 0.343 | 0.285 |
|           | All                | 0.502 | 0.589 | 0.567 | 0.375 | 0.424 | 0.527 | 0.425 | 0.558 | 0.411 | 0.443 | 0.466 | 0.424 |
| PYJ       | WDO                | 0.314 | 0.386 | 0.376 | 0.345 | 0.358 | 0.191 | 0.281 | 0.351 | 0.400 | 0.285 | 0.337 | 0.218 |
|           | WD+UC              | 0.432 | 0.459 | 0.496 | 0.455 | 0.419 | 0.311 | 0.446 | 0.454 | 0.534 | 0.526 | 0.430 | 0.475 |
|           | WD+C               | 0.417 | 0.429 | 0.449 | 0.402 | 0.450 | 0.361 | 0.316 | 0.400 | 0.461 | 0.413 | 0.358 | 0.355 |
|           | All                | 0.479 | 0.581 | 0.596 | 0.588 | 0.563 | 0.490 | 0.403 | 0.457 | 0.531 | 0.524 | 0.461 | 0.439 |
